# Supplementary material
Source: publisher figshare collection journal article supplement (https://karger.figshare.com/ndownloader/files/13183049)
Supplement: Supplementary file 1 [file 13183049]

**Supplemental Data**

**Improved prediction of survival by a risk factor-integrating inflammatory score**

**in Sorafenib treated hepatocellular carcinoma**

Martin Franz Sprinzl#, Martha Kirstein, Sandra Koch, Marie-Luise Seib, Julia Weinmann-Menke, Hauke Lang, Christoph Düber, Daniela Zöller, Jens U. Marquardt, Marcus-Alexander Wörns, Peter Robert Galle, Arndt Vogel, and Arndt Weinmann#

Martin F. Sprinzl1,2# [martin.sprinzl@unimedizin-mainz.de](mailto:martin.sprinzl@unimedizin-mainz.de)

Martha M. Kirstein6 Kirstein.Martha@mh-hannover.de

Sandra Koch1,2 [sandra.koch@unimedizin-mainz.de](mailto:sandra.koch@unimedizin-mainz.de)

Marie-Luise Seib1, marieluise.seib@unimedizin-mainz.de

Julia Weinmann-Menke1,2 [julia.weinmann-menke@unimedizin-mainz.de](mailto:julia.weinmann-menke@unimedizin-mainz.de)

Hauke Lang3 [hauke.lang@unimedizin-mainz.de](mailto:hauke.lang@unimedizin-mainz.de)

Christoph Düber4 christoph.dueber@unimedizin-mainz.de

Gerrit Toenges5 [gtoenges@uni-mainz.de](mailto:gtoenges@uni-mainz.de)

Daniela Zöller5,8 zoeller@imbi-uni-freiburg.de

Jens U. Marquardt1 jens.marquardt@unimedizin-mainz.de

Marcus-Alexander Wörns1 marcus-alexander.woerns@unimedizin-mainz.de

Peter R. Galle1 [peter.galle@unimedizin-mainz.de](mailto:peter.galle@unimedizin-mainz.de)

Arndt Vogel6 [arndt.vogel@mh-hannover.de](mailto:arndt.vogel@mh-hannover.de)

Matthias Pinter7 [matthias.pinter@meduniwien.ac.at](mailto:matthias.pinter@meduniwien.ac.at)

Arndt Weinmann1,2# [arndt.weinmann@unimedizin-mainz.de](mailto:arndt.weinmann@unimedizin-mainz.de)

**Affiliations:**

1Department of Internal Medicine I, University Medical Center of the Johannes Gutenberg University Mainz, Germany of the Johannes Gutenberg University Mainz, Germany

3Department of General, Visceral and Transplant Surgery, University Medical Center of the Johannes Gutenberg University Mainz, Germany

4Department of Diagnostic and Interventional Radiology, University Medical Center of the Johannes Gutenberg University Mainz, Germany

5Insititute of Medical Biostatistics, Epidemiology and Informatics (IMBEI), University Medical Center of the Johannes Gutenberg University Mainz, Mainz, Germany

6Department of Gastroenterology, Hepatology and Endocrinology, Hannover Medical School, Hannover, Germany

7Department of Gastroenterology, Department of Internal Medicine III, Medical University, Vienna, Austria

8Insitute for Medical Biometry and Statistics, Faculty of Medicine and Medical Center – University of Freiburg, Germany

#**Corresponding authors:** Dr. Martin F. Sprinzl / Dr. Arndt Weinmann

**Suppl. Table 1: Baseline characteristics of all Sorafenib patients**

|  | **Exploration cohort** | **Validation cohort** |
| --- | --- | --- |
| **Patient characteristics** | **n=141 (%)** | **n=172 (%)** |
| Age (years), median (range) | 64.3 (24.2-83.5) | 65.0 (36.0-86.0) |
| Gender |  |  |
| Male | 123 (87.2) | 142 (82.6) |
| Female | 18 (12.8) | 30 (17.4) |
| Aetiology of liver disease |  |  |
| Alcohol | 42 (29.8) | 72 (42.4) |
| Hepatitis C | 30 (21.3) | 42 (24.4) |
| Hepatitis B | 27 (19.1) | 17 (9.9) |
| NASH | 11 (7.8) | 15 (8.7) |
| Hemochromatosis | 4 (2.8) | 3 (1.7) |
| Other liver disease | 3 (2.1) | 3 (1.7) |
| Cryptogenic liver cirrhosis | 7 (5.0) | 10 (5.8) |
| Unknown | 17 (12.1) | 13 (7.6) |
| Liver cirrhosis |  |  |
| No | 38 (27.0) | 21 (12.2) |
| Yes | 103 (73.0) | 151 (87.8) |
| Child-Turcotte-Pugh Score |  |  |
| A | 35 (24.8) | 51 (29.7) |
| B | 57 (40.4) | 65 (37.8) |
| C | 11 (7.8) | 35 (20.3) |
| Portal thrombosis |  |  |
| No | 92 (65.2) | 85 (49.4) |
| Yes | 49 (34.8) | 87 (50.6) |
| Progression free survival (months), median (range) | 3.42 (2.29-4.54) | 4.99 (3.62 -6.37) |
| Overall survival (months), median (range) | 5.4 (0.2-88.5) | 7.0 (0.0-83.0) |
| 3 Month-survival rate | 102 (72.3) | 128 (74.4) |
| 6 Month-survival rate | 67 (47.5) | 97 (56.4) |
| 12 Month-survival rate | 34 (24.1) | 55 (32.0) |
| ECOG Score |  |  |
| 0 | 35 (24.8) | 68 (39.5) |
| 1 | 91 (64.5) | 85 (49.4) |
| 2 | 12 (8.5) | 19 (11.0) |
| 3 | 3 (2.1) | --- |
| BCLC classification |  |  |
| A | 2 (1.4) | 1 (0.6) |
| B | 5 (3.5) | 23 (13.4) |
| C | 120 (85.2) | 113 (65.7) |
| D | 14 (9.9) | 35 (20.3) |
| Extrahepatic metastasis |  |  |
| No | 44 (31.2) | 115 (66.9) |
| Yes | 97 (68.8) | 57 (33.1) |
| Maximum tumour diameter (cm), median (range) | 6.6 (0.6-15.0) | 5.1 (1.2-15.8) |
| Sorafenib treatment duration (days) | 142 (6-977) | 147 (1-1916) |
| Number active treatment modalities before sorafenib | | |
| None | 55 (39.0) | 92 (53.5) |
| 1 | 60 (42.6) | 54 (31.4) |
| 2 | 22 (15.6) | 16 (9.3) |
| >2 | 4 (2.8) | 10 (5.8) |
| Baseline laboratory parameters | | |
| AFP (U/L), median (range) | 325 (1 – 336,900) | 84.2 (1-52,271) |
| AST (U/L), median (range) | 76 (19 – 1457) | 85 (21-1923) |
| ALT (U/L), median (range) | 50 (6 – 776) | 46 (11-698) |
| Total bilirubin (mg/dL), median (range) | 1.0 (0.1 – 6.1) | 1.4 (0.1-23.5) |
| Albumin (g/L), median (range) | 30 (13 – 50) | 32 (22-47) |
| INR, median (range) | 1.1 (0.9 – 2.6) | NR |
| CRP (mg/L), median (range) | 18 (0.7 – 271) | 16.8 (0-206) |
| Leukocytes (cells/nl), median (range) | 6.7 (2.0 – 19.8) | 5.5 (1.9-16.5) |
| Thrombocytes (cells/nl), median (range) | 202 (42 – 680) | 142 (34-778) |
| Baseline inflammatory scores | | |
| NLR median (range)# | 3.8 (0.6-18.9) | 3.8 (1.0-46.5) |
| NLR group, n (%)# |  |  |
| <5 | 91 (64.5) | 70 (69.3) |
| >=5 | 50 (35.5) | 31 (30.7) |
| PLR median (range) # | 174.7 (15.7-726.5) | 134.2 (37.5-682.0) |
| PLR group, n (%)# |  |  |
| <150 | 51 (36.2) | 53 (52.5) |
| 150-300 | 63 (44.7) | 31 (30.7) |
| >300 | 27 (19.1) | 17 (9.9) |
| CAR median (range) | 0.6 (0.02-16.3) | 0.5 (0.01-6.7) |
| CAR group, n (%) |  |  |
| <0.37 | 51 (36.2) | 73 (42.5) |
| >=0.37 | 90 (63.8) | 99 (57.6) |
| GPS, n (%) |  |  |
| 0 | 21 (14.9) | 36 (20.9) |
| 1 | 42 (29.8) | 52 (30.2) |
| 2 | 78 (55.3) | 84 (48.8) |
| mGPS, n (%) |  |  |
| 0 | 46 (32.6) | 66 (38.4) |
| 1 | 17 (12.1) | 22 (12.8) |
| 2 | 78 (55.3) | 84 (48.8) |
| GSP-EP, n (%) |  |  |
| 0 | 14 (9.9) | 11 (6.4) |
| 1 | 27 (19.1) | 31 (18.0) |
| 2 | 25 (17.7) | 40 (23.3) |
| 3 | 41 (29.1) | 50 (29.1) |
| 4 | 27 (19.1) | 4 (18.0) |
| 5 | 7 (5.0) | 9 (5.2) |
| Baseline variables were assessed at the time-point of Sorafenib treatment initiation in unselected HCC patients of both cohorts as indicated. BCLC, Barcelona Clinic Liver-Cancer; AFP, alpha-fetoprotein; AST, aspartat-aminotransferase; ALT, alanine-aminotransferase; INR, international normalized ratio; CRP, C-reactive protein. #NLR and PLR was determined for 101 patients in the sorafenb validation cohort. | | |

**Suppl. Table 2: Oncological treatment modalities**

| **Oncological treatment before Sorafenib** | **Exploration cohort** | | **Validation cohort** | |
| --- | --- | --- | --- | --- |
|  | **all** | **BCLC-C** | **all** | **BCLC-C** |
|  | **n=141 (%)** | **N=120 (%)** | **n=172 (%)** | **n=113 (%)** |
| Loco-regional intervention | 71 (50.4) | 57 (47.5) | 63 (36.6) | 41 (36.3) |
| Resection | 32 (22.7) | 29 (24.2) | 29 (16.9) | 24 (21.2) |
| OLT | 12 (5.5) | 11 (9.2) | 8 (4.7) | 6 (5.3) |
| Number treatment modalities |  |  |  |  |
| None | 55 (39.0) | 40 (40.8) | 92 (53.2) | 56 (49.6) |
| 1 | 60 (42.6) | 49 (40.8) | 54 (31.4) | 38 (33.6) |
| 2 | 22 (15.6) | 18 (15.0) | 16 (9.3) | 12 (10.6) |
| >2 | 4 (2.8) | 4 (3.3) | 10 (5.8) | 7 (6.2) |
| Treatment modalities before sorafenib initiation were assessed in unselected HCC patients or selected BCLC-C stage HCC patients of both cohorts as indicated. TACE: trans-arterial chemoembolization, OLT, Orthotopic liver transplantation. | | | | |

**Suppl. Table 3: Univariable risk factor assessment in all patients**

| **Variable** | **Exploration cohort** | | **Validation cohort** | |
| --- | --- | --- | --- | --- |
| **n=141 (%)** | | **n=172 (%)** | |
| **Survival, months**  Median (95%-CI) | **p** | **Survival, months**  Median (95%-CI) | **p** |
| Gender |  |  |  |  |
| Female  Male | 4.1 (3.4-4.8)  5.5 (4.2-6.8) | 0.741 | 6.5 (1.8-11.2)  7.0 (5.0-9.0) | 0.361 |
| Liver cirrhosis | |  |  |  |
| No  Yes | 7.5 (2.2-12.8)  5.0 (3.9-6.2) | **0.024** | 11.3 (6.0-16.6)  7.0 (4.9-9.1) | 0.363 |
| Child Turcotte Pugh stage | |  |  |  |
| No cirrhosis  A  B  C | 7.45 (2.2- 12.8)  10.37 (7.5-13.2)  4.2 (3.5-4.9)  2.7 (1.8-3.6) | **<0.001** | 11.9 (6.1-17.7)  13.0 (9.8-16.2)  6.0 (4.4-7.6)  2.0 (0.0-4.5) | **<0.001** |
| ECOG Score | |  |  |  |
| 0  1  2  3  4 | 11.3 (6.1-17.9)  5.5 (4.9-7.0)  2.0 (1.5-2.3)  1.7 (0.3-4.1)  --- | **<0.001** | 8.5 (6.5-10.5)  8.2 (4.4-12.0)  3.0 (0.2-5.8)  ---  --- | **<0.001** |
| Portal Thrombosis | |  |  |  |
| No  Yes | 7.8 (5.8-9.8)  3.5 (3.0-4.0) | **<0.001** | 10.0 (7.2-12-8)  5.0 (3.0-7.0) | **0.031** |
| Extrahepatic HCC metastasis | | |  |  |
| No  Yes | 4.3 (2.7-5.9)  6.1 (4.8-7.5) | 0.976 | 7.8 (5.3-10.2)  6.1 (3.7-8.6) | 0.200 |
| Aetiology of liver disease | |  |  |  |
| Non-Viral  Viral | 5.0 (4.0-6.1)  7.4 (5.3-9.6) | 0.117 | 7.8 (4.7-10.8)  7.0 (5.7-8.3) | 0.749 |
| Oncologic treatment before Sorafenib | | |  |  |
| No  Yes | 3.9 (2.2-5.6)  7.8 (5.5-10.1) | **<0.001** | 4.6 (2.9-6.4)  9.0 (6.1-11.9) | **0.049** |
| Total Bilirubin | |  |  |  |
| ≤1.2 g/dl  >1.2 g/dl | 8.0 (5.5-10.5)  3.6 (3.0-4.1) | **<0.001** | 11.3 (8.1-14.5)  4.7 (2.7-6.7) | **<0.001** |
| ALT |  |  |  |  |
| <2x UNL  ≥2x UNL | 6.3 (5.0-7.5)  3.9 (2.9-4.9) | 0.231 | 7.0 (5.0-9.1)  6.0 (2.0-10.1) | 0.185 |
| Thrombocytes | |  |  |  |
| <100/nl  ≥100/nl | 8.6 (4.6-16.2)  5.3 (4.3-6.9) | 0.437 | 7.0 (4.5-9.5)  7.3 (3.9-10.8) | 0.950 |
| NLR# |  |  |  |  |
| <5  ≥5 | 10.4 (6.2-14.6)  4.5 (3.7-5.6) | **0.001** | 10.0 (8.1-12.0)  5.4 (0.7-10.1) | **<0.001** |
| PLR# |  |  |  |  |
| <150  150-300  >300 | 6.7 (4.8-8.5)  4.1 (3.4-4.8)  5.5 (3.5-7.5) | 0.168 | 9.4 (6.8-12.1)  6.4 (3.0-9.8)  3.4 (0.2-6.6) | 0.078 |
| CAR |  |  |  |  |
| <0.37  ≥0.37 | 11.6 (7.7-15.5)  4.1 (3.3-4.9) | **<0.001** | 12.0 (8.9-15.0)  4.0 (2.6-5.4) | **<0.001** |
| GPS |  |  |  |  |
| 0  1  2 | 17.1 (10.5-23.7)  6.9 (5.6-8.2)  3.8 (4.2-6.9) | **<0.001** | 13.8 (5.8-21.8)  7.0 (2.5-11.5)  4.3 (2.8-5.8) | **<0.001** |
| mGPS |  |  |  |  |
| 0  1  2 | 10.9 (7.5-14.3)  6.7 (4.1-9.2)  3.8 (4.2-6.9) | **<0.001** | 11.3 (7.5-15.1)  8.9 (0.0-19.3)  4.3 (2.8-5.8) | **<0.001** |
| GPS-EP |  |  |  |  |
| 0  1  2  3  4  5  6 | 25.92 (15.59-36.25)  13.51 (8.91-18.10)  6.27 (4.85-7.68)  5.10 (4.23-5.97)  2.47 (1.90-3.03)  2.00 (0.72-3.28)  --- | **<0.001** | 10.0 (5.4-14.6)  11.3 (6.8-15.9)  5.3 (3.0-7.7)  7.3 (2.7-12.0)  2.3 (0.0-4.7)  1.1 (0.4-1.7)  --- | **<0.001** |
| Baseline variables were assessed at the time-point of Sorafenib treatment initiation in unselected HCC patients of both cohorts as indicated. ALT, alanine-aminotransferase; UNL, upper normal limits; PLR, platelet to lymphocyte ratio; NLR, neutrophil to leukocyte ratio; CAR, C-reactive protein to albumin ratio; GPS, Glasgow prognostic score; mGPS, modified Glasgow prognostic score; GPS-EP, ECOG/portal thrombosis-extended Glasgow prognosis score; NR, not rated. Kaplan-Meier analysis, #NLR and PLR was determined for 101 patients in the sorafenb validation cohort. Log Rank test, p-value across all strata. | | | | |

**Suppl. Table 4: Multivariable risk factor assessment in all patients**

| **Variable** | **Exploration cohort** | | **Validation cohort** | |
| --- | --- | --- | --- | --- |
| **n=141 (%)** | | **n=172 (%)** | |
| **Hazard Ratio**  Exp(B) (95%-CI) | **p** | **Hazard Ratio**  Exp(B) (95%-CI) | **p** |
| Child Turcotte Pugh stage |  |  |  |  |
| No LCI  A  B  C | ---  0.87 (0.54-1.42)  1.31 (0.69-2.49)  2.19 (0.82-5.83) | 0.320*  0.581  0.402  0.118 | ---  0.52 (0.22-1.20)  0.66 (0.28 -1.56)  0.55 (0.20 -1.50) | 0.467*  0.126  0.344  0.241 |
| ECOG Score |  |  |  |  |
| 0  1  2  3  4 | ---  1.91 (1.20-3.03)  5.85 (2.50-13.71)  11.15 (2.68-46.41)  --- | **<0.001***  0.006  <0.001  <0.001 | ---  0.97 (0.59-1.58)  2.561 (0.75-8.80)  ---  **---** | 0.273  0.897  0.135 |
| Portal Thrombosis |  |  |  |  |
| No  Yes | ---  1.96 (1.27-3.02) | **0.001** | 2.11 (1.17-3.79) | **0.013** |
| Extrahepatic HCC metastasis |  |  |  |  |
| No  Yes | ---  1.342 (0.87-2.08) | 0.187 | ---  1.04 (0.58-1.86) | 0.900 |
| Aetiology of liver disease |  |  |  |  |
| Non-Viral  Viral | ---  0.78 (0.54-1.12) | 0.177 | ---  1.30 (0.78-2.18) | 0.317 |
| Oncologic treatment before Sorafenib |  |  |  |  |
| No  Yes | ---  1.05 (0.70-1.56) | 0.911 | ---  1.07 (0.66-1.74) | 0.772 |
| Total Bilirubin |  |  |  |  |
| ≤1.2 g/dl  >1.2 g/dl | ---  0.71 (0.38-1.32) | ---  0.246 | ---  2.00 (1.09-3.66) | **0.025** |
| Thrombocytes |  |  |  |  |
| <100/nl  ≥100/nl | ---  0.87 (0.49-1.56) | 0.638 | ---  1.15 (0.63-2.10) | 0.645 |
| NLR |  |  |  |  |
| <5  ≥5 | ---  1.71 (1.00-2.92) | **0.050** | ---  2.28 (1.30-3.98) | **0.004** |
| PLR |  |  |  |  |
| <150  150-300  >300 | ---  0.97 (0.62-1.53)  0.87 (0.47-1.64) | 0.905*  0.781  0.958 | ---  0.83 (0.44-1.53)  1.94 (0.86-4.36) | 0.064*  0.541  0.108 |
| CAR |  |  |  |  |
| <0.37  ≥0.37 | ---  2.24 (1.44-3.49) | **<0.001** | ---  2.08 (1.13-3.81) | **0.018** |
| GPS |  |  |  |  |
| 0  1  2 | ---  1.26 (0.69-2.31)  2.32 (1.26-4.29) | **0.007***  0.459  0.007 | ---  4.44 (2.20-8.95)  3.75 (1.72-8.18) | **<0.001***  <0.001  0.001 |
| mGPS |  |  |  |  |
| 0  1  2 | ---  1.71 (0.93-3.12)  2.30 (1.43-3.68) | **0.002***  0.084  <0.001 | ---  2.61 (1.28-5.33)  1.93 (1.01-3.69) | **0.020***  0.008  0.048 |
| GPS-EP |  |  |  |  |
| 0  1  2  3  4  5  6 | ---  1.90 (0.85-4.20)  2.78 (1.20-6.42)  3.10 (1.25-7.67)  9.30 (3.00-28.82)  5.53 (1.03-29.62)  --- | **0.003***  0.116  0.017  0.015  <0.001  0.046 | ---  0.77 (0.23-2.59)  0.94 (0.29-3.06)  2.55 (0.79-8.20)  4.02 (1.10-14.74)  6.71 (1.20-7.65)  --- | **0.005**  0.671  0.912  0.117  0.036  0.031 |
| Baseline variables were assessed at the time-point of Sorafenib treatment initiation in unselected HCC patients of both cohorts as indicated. PLR, platelet to lymphocyte ratio; NLR, neutrophil to leukocyte ratio; CAR, C-reactive protein to albumin ratio; GPS, Glasgow prognostic score, mGPS, modified Glasgow prognostic score, GPS-EP, ECOG/portal thrombosis-extended Glasgow prognosis score; NR, not rated. Multivariable Cox regression included covariable analysis of Child-Turcotte-Pugh stage, ECOG score, portal thrombosis, extrahepatic metastasis, oncological pre-treatment, viral etiology, hyperbilirubinemia, thrombocytopenia, PLR and NLR. *overall p-value across all strata. | | | | |

**Suppl. Table 5a:** Comparative ROC analysis: All patients

|  | **All patients sorafenib exploration cohort (n=141)** | | | | | |
| --- | --- | --- | --- | --- | --- | --- |
| **3 Month Survival** | | **6 Month Survival** | | **12 Month Survival** | |
| **AUC (95%-CI)** | **P** | **AUC (95%-CI)** | **P** | **AUC (95%-CI)** | **p** |
| NLR cat. (>/≤5) | 0.620 (0.523-0.717) | 0.027 | 0.635 (0.542-0.727) | 0.006 | 0.628 (0.515-0.741) | 0.025 |
| PLR cat. (<150/150-300/>300) | 0.576 (0.473-0.680) | 0.163 | 0.578 (0.484-0.672) | 0.110 | 0.573 (0.465-0.682) | 0.198 |
| CAR cat. (</≥0.37) | 0.661 (0.567-0.756) | 0.003 | 0.710 (0.623-0.797) | <0.001 | 0.746 (0.648-0.844) | <0.001 |
| GPS | 0.710 (0.622-0.799) | <0.001 | 0.746 (0.663-0.829) | <0.001 | 0.763 (0.668-0.859) | <0.001 |
| mGPS | 0.706 (0.615-0.796) | <0.001 | 0.734 (0.649-0.819) | <0.001 | 0.749 (0.653-0.844) | <0.001 |
| **GPS-EP** | **0.791 (0.702-0.880)** | **<0.001** | **0.818 (0.749-0.888)** | **<0.001** | **0.836 (0.764-0.907)** | **<0.001** |
| wGPS-EP | 0.773 (0.681-0.864) | <0.001 | 0.806 (0.734-0.878) | <0.001 | 0.834 (0.759-0.909) | <0.001 |
|  | **All patients sorafenib validation cohort (n=172)** | | | | | |
|  | **3 Month Survival** | | **6 Month Survival** | | **12 Month Survival** | |
| NLR cat. (>/≤5) | 0.634 (0.508-0.759) | 0.038 | 0.570 (0.457-0.684) | 0.227 | 0.633 (0.522-0.744) | 0.032 |
| PLR cat. (<150/150-300/>300) | 0.635 (0.511-0.759) | 0.036 | 0.593 (0.481-0.706) | 0.109 | 0.538 (0.419-0.657) | 0.540 |
| CAR cat. (</≥0.37) | 0.637 (0.521-0.752) | 0.034 | 0.652 (0545-0.759) | 0.009 | 0.659 (0.542-0.776) | 0.010 |
| GPS | 0.666 (0.560-0.773) | 0.010 | 0.683 (0.581-0.786) | 0.002 | 0.713 (0.599-0.826) | 0.001 |
| mGPS | 0.632 (0.514-0.750) | 0.041 | 0.642 (0.534-0.750) | 0.015 | 0.673 (0.560-0.786) | 0.005 |
| **GPS-EP** | **0.721 (0.609-0.832)** | **0.001** | **0.730 (0.632-0.828)** | **<0.001** | **0.763 (0.670-0.856)** | **<0.001** |
| wGPS-EP | 0.667 (0.574-0.759) | 0.001 | 0.697 (0.619-0.776) | <0.001 | 0.742 (0.670-0.815) | <0.001 |
| ROC-AUC analysis was performed in unselected HCC patients of both cohorts as indicated. ROC values were assessed for the 3-, 6- and 12-month survival according to inflammatory scores defined by platelet to lymphocyte ratios (PLR); neutrophil to leukocyte ratios (NLR); C-reactive protein to albumin ratios (CAR), the Glasgow prognostic score (GPS) and the modified GPS (mGPS), ECOG/portal thrombosis-extended Glasgow prognosis score (GPS-EP). The weighted GPS-EP (wGPS-EP) summarizes parameters (score weighted by regression coefficients) as follows: GPS-1 (0) GPS-1 (1), GPS-2 (4), ECOG-0 (0), ECOG-1 (2), ECOG-2 (8), and portal thrombosis (3).  Cat. = categorical. P-values were determined according to DeLong et al. [34]. | | | | | | |

**Suppl. Table 5b: Comparative ROC analysis: BCLC-C patients**

|  | **BCLC-C patients sorafenib exploration cohort (n=120)** | | | | | |
| --- | --- | --- | --- | --- | --- | --- |
| **3 Month Survival** | | **6 Month Survival** | | **12 Month Survival** | |
| **AUC (95%-CI)** | **P** | **AUC (95%-CI)** | **p** | **AUC (95%-CI)** | **p** |
| NLR cat. (>/≤5) | 0.630 (0.522-0.737) | 0.036 | 0.645 (0.546-0.744) | 0.006 | 0.633 (0.514-0.753) | 0.029 |
| PLR cat. (<150/150-300/>300) | 0.576 (0.456-0.695) | 0.221 | 0.587 (0.485-0.689) | 0.100 | 0.584 (0.468-0.701) | 0.167 |
| CAR cat. (</≥0.37) | 0.634 (0.524-0.743) | 0.056 | 0.719 (0.626-0.812) | <0.001 | 0.761 (0.659-0.863) | <0.001 |
| GPS | 0.696 (0.595-0.797) | 0.002 | 0.747 (0.651-0.832) | <0.001 | 0.766 (0.664-0.868) | <0.001 |
| mGPS | 0.685 (0.578-0.791) | 0.003 | 0.742 (0.651-0.832) | <0.001 | 0.754 (0.652-0.855) | <0.001 |
| **GPS-EP** | **0.768 (0.658-0,878)** | **<0.001** | **0.812 (0.734-0.890)** | **<0.001** | **0.826 (0.746-0.907)** | **<0.001** |
| wGPS-EP | 0.771 (0.666-0.876) | <0.001 | 0.798 (0.719-0.877) | <0.001 | 0.825 (0.743-0.907) | <0.001 |
|  | **BCLC-C patients sorafenib validation cohort (n=113)** | | | | | |
|  | **3 Month Survival** | | **6 Month Survival** | | **12 Month Survival** | |
| NLR cat. (>/≤5) | 0.534 (0.354-0.714) | 0.709 | 0.559 (0.417-0.702) | 0.417 | 0.563 (0.418-0.708) | 0.408 |
| PLR cat. (<150/150-300/>300) | 0.549 (0.369-0.729) | 0.587 | 0.568 (0.425-0.710) | 0.357 | 0.543 (0.397-0.690) | 0.568 |
| CAR cat. (</≥0.37) | 0.605 (0.438-0.771) | 0.248 | 0.713 (0.582-0.843) | 0.004 | 0.667 (0.525-0.809) | 0.028 |
| GPS | 0.677 (0.539-0.815) | 0.051 | 0.797 (0.684-0.911) | <0.001 | 0.774 (0.650-0.899) | <0.001 |
| mGPS | 0.612 (0.440-0.783) | 0.218 | 0.749 (0.625-0.873) | 0.001 | 0.733 (0.605-0.862) | 0.002 |
| **GPS-EP** | **0.775 (0.651-0.900)** | **0.002** | **0.761 (0.644-0.878)** | **<0.001** | **0.798 (0.650-0.862)** | **<0.001** |
| wGPS-EP | 0.661 (0.534-0.786) | 0.014 | 0.698 (0.599-0.796) | <0.001 | 0.745 (0.657-0.833) | <0.001 |
| ROC-AUC analysis was performed in selected BCLC-C stage HCC patients of both cohorts as indicated. ROC values were assessed for the 3-, 6- and 12-month survival according to inflammatory scores defined by platelet to lymphocyte ratios (PLR); neutrophil to leukocyte ratios (NLR); C-reactive protein to albumin ratios (CAR), the Glasgow prognostic score (GPS) and the modified GPS (mGPS), ECOG/portal thrombosis-extended Glasgow prognosis score (GPS-EP). The weighted GPS-EP (wGPS-EP) summarizes parameters (score weighted by regression coefficients) as follows: GPS-1 (0) GPS-1 (1), GPS-2 (4), ECOG-0 (0), ECOG-1 (2), ECOG-2 (8), and portal thrombosis (3).  Cat. = categorical. P-values were determined according to DeLong et al. [34]. | | | | | | |

Suppl. Table 6: Survival prediction by inflammatory scores in BCLC-C patients

| **Exploration cohort (n=120)** | **Prediction of 3 month overall survival** | |
| --- | --- | --- |
| **Score (cut off)** | **Specificity (%)** | **Sensitivity (%)** |
| CAR (>0.37) | 36.26 (27.13-46.51) | 89.66 (73.61-96.42) |
| NLR (>5) | 43.96 (34.21-54.19) | 82.76 (65.45-92.40) |
| GPS (>1 point) | 54.95 (44.73-64.76) | 82.76 (24.00-92.40) |
| mGPS (>1 point) | 54.95 (44.73-64.76) | 82.76 (24.00-92.40) |
| GPS-EP (>2 points) | 56.04 (45.81-65.79) | 79.31 (24.00-90.15) |
| GPS-EP (>3 points) | 89.01 (80.94-93.92) | 58.62 (24.00-74.49) |
| **Exploration cohort (n=120)** | **Prediction of 12 month overall survival** | |
| **Score (cut off)** | **Specificity (%)** | **Sensitivity (%)** |
| CAR (>0.37) | 76.67 (59.57-88.21) | 75.57 (65.75-83.27) |
| NLR (>5) | 59.00 (33.15-66.85) | 76.67 (66.95-84.20) |
| GPS (>1 point) | 80.00 (62.69-90.50) | 65.56 (55.28-74.55) |
| mGPS (>1 point) | 80.00 (62.69-90.50) | 65.56 (55.28-74.55) |
| GPS-EP (>2 points) | 83.33 (66.44-92.66) | 64.44 (54.15-73.56) |
| GPS-EP (>3 points) | 100.00 (88.65-100.00) | 30.00 (21.51-40.13) |
| **Validation cohort (n=113)** | **Prediction of 3 month overall survival** | |
| **Score (cut off)** | **Specificity (%)** | **Sensitivity (%)** |
| CAR (>0.37) | 52.69 (42.64-62.53) | 75.00 (24.00-88.81) |
| NLR (>5) | 76.09 (62.06-86.09) | 22.22 (24.00-54.74) |
| GPS (>1 point) | 61.29 (51.13-70.55) | 50.00 (24.00-70.07) |
| mGPS (>1 point) | 61.29 (51.13-70.55) | 50.00 (24.00-70.07) |
| GPS-EP (>2 points) | 50.54 (40.56-60.47) | 75.00 (24.00-88.81) |
| GPS-EP (>3 points) | 86.02 (77.54-91.65) | 35.00 (24.00-56.71) |
| **Validation cohort (n=113)** | **Prediction of 12 month overall survival** | |
| **Score (cut off)** | **Specificity (%)** | **Sensitivity (%)** |
| CAR (>0.37) | 62.50 (47.03-75.78) | 60.27 (24.00-70.71) |
| NLR (>5) | 77.78 (54.78-91.00) | 24.32 (24.00-40.12) |
| GPS (>1 point) | 77.50 (62.50-87.68) | 50.68 (24.00-61.83) |
| mGPS (>1 point) | 77.50 (62.50-87.68) | 50.68 (24.00-61.83) |
| GPS-EP (>2 points) | 67.50 (52.02-79.92) | 65.75 (24.00-75.61) |
| GPS-EP (>3 points) | 97.50 (87.12-99.56) | 26.03 (24.00-37.11) |
| Specificity and sensitivity to predict 3- and 12-month survival at defined cut offs was assessed in selected BCLC-C stage HCC patients of both cohorts as indicated. The results for neutrophil to leukocyte ratio (NLR); C-reactive protein to albumin ratio (CAR), Glasgow prognostic score (GPS), modified GPS (mGPS) and ECOG/portal thrombosis-extended Glasgow prognosis score (GPS-EP) are shown. The 95%-confidence interval was determined by Wilson-Score. | | |
